# Supplementary material
Source: MDPI journal article supplement (https://www.mdpi.com/2075-163X/13/8/999)
Supplement: s1 [file s1]

## Supplementary material

**Table S1: Composition of the Hanford Secondary Waste (HSW) solution**

| Order of addition | Analyte                              | Target  | Reagent                                                           | Assay | Target weight    |
|-------------------|--------------------------------------|---------|-------------------------------------------------------------------|-------|------------------|
|                   |                                      | 6X*, M  |                                                                   |       | (1 L)            |
| 1                 | Ag <sup>+</sup>                      | 3.80E-5 | AgNO <sub>3</sub>                                                 | 0.999 | 0.0064           |
| 1                 | As <sup>5+</sup>                     | 2.09E-4 | Na <sub>2</sub> HAsO <sub>4</sub> *7H <sub>2</sub> O              | 1.000 | 0.0652           |
| 1                 | Al <sup>3+</sup>                     | 5.63E-1 | Al(OH) <sub>3</sub>                                               | 0.765 | 57.4473          |
| 1                 | Cd <sup>2+</sup>                     | 9.42E-6 | Cd(NO <sub>3</sub> ) <sub>2</sub> *4H <sub>2</sub> O              | 0.985 | 0.0030           |
| 1                 | CO <sub>3</sub> <sup>2-</sup>        | 1.37E-1 | Na <sub>2</sub> CO <sub>3</sub>                                   | 1.000 | 14.5021          |
| 1                 | Cr <sup>6+</sup>                     | 1.22E-3 | Na <sub>2</sub> Cr <sub>2</sub> O <sub>7</sub> *2H <sub>2</sub> O | 0.990 | 0.3666           |
| 1                 | Hg <sup>2+</sup>                     | 6.78E-5 | Hg(NO <sub>3</sub> ) <sub>2</sub> *H <sub>2</sub> O               | 0.980 | 0.0237           |
| 1                 | PO <sub>4</sub> <sup>3-</sup>        | 4.12E-2 | Na <sub>2</sub> HPO <sub>4</sub> *7H <sub>2</sub> O               | 0.990 | 11.1578          |
| 1                 | Si <sup>4+</sup>                     | 1.13E-2 | Na <sub>2</sub> SiO <sub>3</sub>                                  | 0.980 | 1.4050           |
| 1                 | SO <sub>4</sub> <sup>2-</sup>        | 2.65E-2 | Na <sub>2</sub> SO <sub>4</sub>                                   | 0.990 | 3.7963           |
| 1                 | NO <sub>3</sub> <sup>-</sup>         | 1.97    | NaNO <sub>3</sub>                                                 | 0.980 | 170.3539         |
| 1                 | NO <sub>2</sub> <sup>-</sup>         | 7.20E-2 | NaNO <sub>2</sub>                                                 | 0.980 | 5.0690           |
| 1                 | Cl <sup>-</sup>                      | 1.35E-1 | NaCl                                                              | 0.980 | 8.0508           |
| 1                 | F <sup>-</sup>                       | 3.34E-3 | NaF                                                               | 0.990 | 0.1364           |
| 1                 | K <sup>+</sup>                       | 3.50E-3 | KNO <sub>3</sub>                                                  | 0.990 | 0.3572           |
| 1                 | Pb <sup>2+</sup>                     | 5.39E-5 | Pb(NO <sub>3</sub> ) <sub>2</sub>                                 | 0.990 | 0.0180           |
| 1                 | TOC                                  | 5.02E-1 | Na <sub>2</sub> C <sub>2</sub> O <sub>4</sub>                     | 0.980 | 68.7023          |
| 1                 | TOC                                  | 6.10E-2 | Oxalic acid dihydrate                                             | 0.980 | 7.8408           |
| 2                 | H <sub>2</sub> O                     | —       | H <sub>2</sub> O                                                  | —     | 770.4100         |
| 3                 | OH <sup>-</sup>                      | 2.38    | NaOH                                                              | 0.987 | 96.6080          |
| 4                 | I <sup>-</sup>                       | 3.94E-4 | NaI                                                               | 0.999 | 0.0591           |
| 4                 | (Tc <sup>7+</sup> ) Re <sup>7+</sup> | 2.69E-4 | HReO <sub>4</sub>                                                 | 0.562 | 0.0890           |
|                   |                                      |         | <b>Total (g)</b>                                                  |       | <b>1216.4680</b> |

\*) original solution 6x concentrated
